# Supplementary material
Source: PubMed Central journal article supplement (PMC9212921)
Supplement: mmc1.pdf [file mmc1.pdf]

**Dear participant,**

**COVID-19 vaccine has been attributed as one of the promising and effective ways to end the ongoing pandemic. Several vaccine candidates are in different phases of clinical development, some have advanced to phase III clinical trial, and some are gaining approval in some countries under Emergency Use Authorization (EUA). The vaccine is expected to be available in limited quantities in coming months, if the safety and efficacy data are promising. One of the criteria that determines the success of the COVID-19 vaccination program is people's willingness to accept the vaccine. Healthcare workers are one of the priority groups for COVID-19 vaccination. It is therefore important to understand the acceptance of COVID-19 vaccine in this group.**

**This study aims to understand COVID-19 vaccine acceptance among the healthcare providers, and also find out potential barriers and facilitators for COVID-19 vaccination in this group. The findings of this study will assist in developing the communication plan for the introduction of COVID-19 vaccine in Oman.**

**The results of the study will be shared with various governorates involved in the study as well as with the Ministry of Health in Oman. The identity of the participant will not be disclosed at any point during and after the study.**

**Participation in this study is completely voluntary. If you decide not to participate there will not be any negative consequences. If you decide to participate in the study, you may stop participating at any time.**

**By agreeing to participate in the study, you consent to fill out the survey.**

**For questions please contact community-based initiative department- Ministry of Health, Tel: 24946399, Email: cbioman@gmail.com**

**Thank you.**

**\* 1. What is your age (in years)?**

20-29

50-59

30-39

≥ 60

40-49

**\* 2. What is your Gender?**

Male

Female

\* 3. Marital status

- Single (Not yet married/ divorced/ widow)
- Married

\* 4. Nationality

- Omani
- Non-Omani

\* 5. What is your highest educational status?

- Diploma
- Completed Bachelor/MD degree
- Completed Masters/ Specialist
- Completed Subspecialists
- Completed Doctorate

\* 6. What is your job title?

- Doctor
- Nurses
- Midwives
- Pharmaceutical staff
- Other (please specify)
- Public health staff
- Community health workers
- Paramedic

\* 7. In which governorate is your health facility located?

- Muscat
- Dhofar
- Musandam
- Al-Buraymi
- Al-Dakhiliyah
- North Al-Batinah
- South Al-Batinah
- North Al-Sharqiyah
- South Al-Sharqiyah
- Al-Dhahirah
- Al-Wusta

\* 8. Which type of health facility is this?

- Primary care
- Secondary care
- Tertiary care

\* 9. Have you been infected with SARS-CoV2? (SARS-CoV2 causes COVID-19)

- Yes, confirmed
- Yes, suspected
- No
- Do not know

\* 10. Indicate True or False for the following statements.

|                                                                                | True                  | False                 |
|--------------------------------------------------------------------------------|-----------------------|-----------------------|
| COVID-19 spreads via respiratory droplets of infected population.              | <input type="radio"/> | <input type="radio"/> |
| Person with COVID-19 cannot transmit the virus to others when fever is absent. | <input type="radio"/> | <input type="radio"/> |
| The novel corona virus (SARS-CoV-2) is similar to SARS-CoV and MERS-CoV.       | <input type="radio"/> | <input type="radio"/> |
| There is no effective therapeutic cure for COVID-19 yet.                       | <input type="radio"/> | <input type="radio"/> |

\* 11. Indicate your level of agreement on the following statements. (1- Strongly Agree, 2- Agree, 3- Neither Agree nor Disagree, 4- Disagree, 5- Strongly Disagree)

|                                                                         | Strongly Agree        | Agree                 | Neither Agree nor Disagree | Disagree              | Strongly Disagree     |
|-------------------------------------------------------------------------|-----------------------|-----------------------|----------------------------|-----------------------|-----------------------|
| All my activities will be disrupted if I get ill with COVID-19.         | <input type="radio"/> | <input type="radio"/> | <input type="radio"/>      | <input type="radio"/> | <input type="radio"/> |
| I am worried that I might experience stigma if I get ill with COVID-19. | <input type="radio"/> | <input type="radio"/> | <input type="radio"/>      | <input type="radio"/> | <input type="radio"/> |
| COVID-19 is a serious disease for me.                                   | <input type="radio"/> | <input type="radio"/> | <input type="radio"/>      | <input type="radio"/> | <input type="radio"/> |
| COVID-19 is a serious disease for my family.                            | <input type="radio"/> | <input type="radio"/> | <input type="radio"/>      | <input type="radio"/> | <input type="radio"/> |
| COVID-19 is not a disease that needs serious attention.                 | <input type="radio"/> | <input type="radio"/> | <input type="radio"/>      | <input type="radio"/> | <input type="radio"/> |

\* 12. Indicate your level of agreement on the following statements (1- Strongly Agree, 2- Agree, 3- Neither Agree nor Disagree, 4- Disagree, 5- Strongly Disagree)

|                                                                                   | Strongly Agree        | Agree                 | Neither Agree nor Disagree | Disagree              | Strongly Disagree     |
|-----------------------------------------------------------------------------------|-----------------------|-----------------------|----------------------------|-----------------------|-----------------------|
| COVID-19 vaccination can protect me from getting infected by SARS-CoV-2.          | <input type="radio"/> | <input type="radio"/> | <input type="radio"/>      | <input type="radio"/> | <input type="radio"/> |
| COVID-19 vaccination will protect my family as well if they are also vaccinated.  | <input type="radio"/> | <input type="radio"/> | <input type="radio"/>      | <input type="radio"/> | <input type="radio"/> |
| One of the ways to prevent COVID-19 complication is through COVID-19 vaccination. | <input type="radio"/> | <input type="radio"/> | <input type="radio"/>      | <input type="radio"/> | <input type="radio"/> |
| COVID-19 vaccination will not yield any benefit for me.                           | <input type="radio"/> | <input type="radio"/> | <input type="radio"/>      | <input type="radio"/> | <input type="radio"/> |

\* 13. Indicate your level of agreement on the following statements (1- Strongly Agree, 2- Agree, 3- Neither Agree nor Disagree, 4- Disagree, 5- Strongly Disagree)

|                                                                                                                      | Strongly Agree        | Agree                 | Neither Agree nor Disagree | Disagree              | Strongly Disagree     |
|----------------------------------------------------------------------------------------------------------------------|-----------------------|-----------------------|----------------------------|-----------------------|-----------------------|
| I am worried about the safety of COVID-19 vaccine.                                                                   | <input type="radio"/> | <input type="radio"/> | <input type="radio"/>      | <input type="radio"/> | <input type="radio"/> |
| I do not need COVID-19 vaccine because i am healthy.                                                                 | <input type="radio"/> | <input type="radio"/> | <input type="radio"/>      | <input type="radio"/> | <input type="radio"/> |
| I am worried that there will be side effects after COVID-19 vaccination.                                             | <input type="radio"/> | <input type="radio"/> | <input type="radio"/>      | <input type="radio"/> | <input type="radio"/> |
| I believe COVID-19 disease prevention method naturally is much better than to be vaccinated (with COVID-19 vaccine). | <input type="radio"/> | <input type="radio"/> | <input type="radio"/>      | <input type="radio"/> | <input type="radio"/> |
| I will still get COVID-19 even when i have already been vaccinated (with COVID-19 vaccine).                          | <input type="radio"/> | <input type="radio"/> | <input type="radio"/>      | <input type="radio"/> | <input type="radio"/> |

\* 14. Have you been treating COVID-19 patient?

Yes

No

\* 15. Do you think you are at risk of contracting COVID-19?

Yes

No

\* 16. Have you receive influenza vaccine during the last five years?

Yes

No

\* 17. Are you aware about the different phases of COVID-19 vaccine trial that is currently being conducted in different parts of the world?

Yes

No

\* 18. Are you aware that Oman is planning for the introduction of COVID-19 vaccine once available in coming months?

Yes

No

\* 19. Are you willing to receive the COVID-19 vaccine once introduced?

Yes

No

Not sure yet

\* 20. If Yes, what are the reasons? (Tick all that apply)

I think COVID-19 vaccine is safe.

I think COVID-19 vaccine will be effective to prevent future COVID-19 infection.

COVID-19 is dangerous to my health.

I would like to protect myself and people around me.

\* 21. If No/Not sure, what are the reasons? (Tick all that apply)

- I am concerned about the potential side effects of the vaccine.
- I think COVID-19 vaccine may not be safe.
- I think COVID-19 vaccine will not be effective to prevent future infections.
- I think COVID-19 is not dangerous to my health.

\* 22. Would you recommend your patients to take COVID-19 vaccine?

- Yes
- No

\* 23. Would you recommend your family members and friends to take COVID-19 vaccine?

- Yes
- No

\* 24. Would you consider vaccine efficacy as a criteria to receive or recommend the COVID-19 vaccine?

- Yes, I would only receive or recommend the vaccine if it is  $\geq 80\%$  effective.
- Yes i would receive or recommend the vaccine even if it is 50 -  $<80\%$  effective.
- I would receive or recommend the vaccine irrespective of the vaccine efficacy.

\* 25. Rank the following population who you think should be prioritized for vaccination if the vaccine(s) is/are available in limited supply in the initial phase of vaccination program. (1-highest priority, 6-least priority)

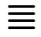

Elderly people

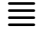

Healthcare workers

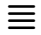

People with underlying medical conditions



Frontline and essential workers

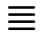

Young population

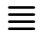

Children



\* 26. Rank your sources of information on COVID-19, COVID-19 vaccine and vaccination. (1- Most frequent source, 6- least frequent source)

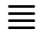

Social Media (Facebook, Twitter, LinkedIn, Instagram)

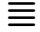

Radio, Television, Newspaper

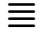

Scientific Journals

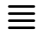

Workplace

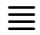

Fellow colleagues

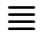

Website of Ministry of Health

\* 27. What are the things you think that need to be communicated when the COVID-19 vaccine will be introduced? (Tick all that apply)

How to prevent COVID-19?

What is the safety profile of COVID-19 vaccine?

How does COVID-19 spread and what is the risk of spread?

Are there any risks associated with COVID-19 vaccine to its users?

How important is COVID-19 vaccination to mitigate COVID-19 spread?

What is the benefit of vaccine?

How effective will the COVID-19 vaccine be in preventing future COVID-19 infections?

\* 28. Rank the suitable medias for communication and spreading awareness on COVID-19 vaccination and related information. (1- Most suitable, 8- least suitable)

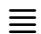

Direct counseling or promotion

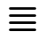

Newspaper

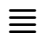

Radio

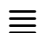

Television

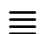

WhatsApp

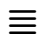

Other social medias (Instagram, facebook, twitter)

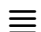

Ministry of Health website

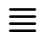

Posters/leaflets/brochure

\* 29. Indicate your level of agreement on the following statements (1- Strongly Agree, 2- Agree, 3- Neither Agree nor Disagree, 4- Disagree, 5- Strongly Disagree)

|                                                                                                                                              | Strongly Agree        | Agree                 | Neither Agree nor Disagree | Disagree              | Strongly Disagree     |
|----------------------------------------------------------------------------------------------------------------------------------------------|-----------------------|-----------------------|----------------------------|-----------------------|-----------------------|
| My government is handling the COVID-19 crisis very well.                                                                                     | <input type="radio"/> | <input type="radio"/> | <input type="radio"/>      | <input type="radio"/> | <input type="radio"/> |
| My government provides transparent and up-to-date information on COVID-19 vaccine development and its introduction in the Sultanate of Oman. | <input type="radio"/> | <input type="radio"/> | <input type="radio"/>      | <input type="radio"/> | <input type="radio"/> |
| I trust the government on COVID-19 vaccination planning and introduction.                                                                    | <input type="radio"/> | <input type="radio"/> | <input type="radio"/>      | <input type="radio"/> | <input type="radio"/> |
| I value the importance of vaccine and vaccination more now after the onset of COVID-19 pandemic.                                             | <input type="radio"/> | <input type="radio"/> | <input type="radio"/>      | <input type="radio"/> | <input type="radio"/> |
| I valued the importance of vaccine and vaccination before the COVID-19 pandemic as well.                                                     | <input type="radio"/> | <input type="radio"/> | <input type="radio"/>      | <input type="radio"/> | <input type="radio"/> |
